# Supplementary material
Source: Springer Nature journal article supplement (https://www.springermedizin.de/resource/supplementary/12875_2010_517_MOESM6_ESM.pdf/9434788)

**Implementation of local health centres/networks  
(coercive influence)**

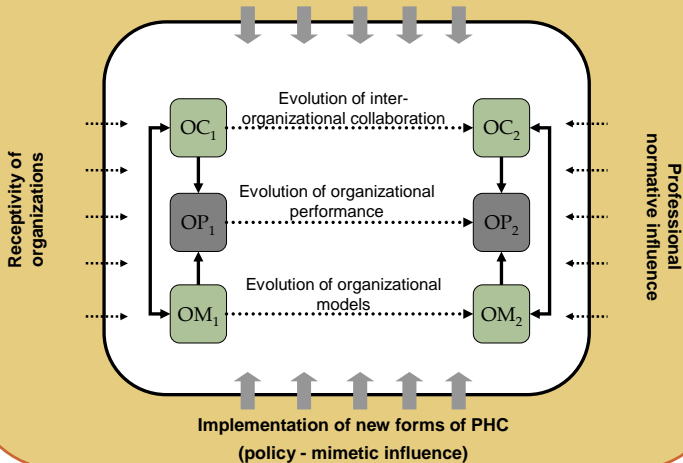

Supplement: MOESM6 [file 9434788]
